# Supplementary material
Source: PubMed Central journal article supplement (PMC3035987)

1 **Figure S1. Adult CD4<sup>+</sup> LTi cells are a dominant innate source of IL-22 in the gut following C.**  
2 **rodentium infection, related to Figure 2.** (A) C57BL/6 mice were infected with *C. rodentium* on day 0  
3 and sacrificed on day 4. Frequency of ex vivo stimulated IL-22<sup>+</sup> innate cells gated as indicated in IEL of  
4 infected mice. All data are representative of 2 or more independent experiments with a minimum of 3-4  
5 mice per group. (B) C57BL/6 mice were infected with *C. rodentium* on day 0 and sacrificed on days 2, 4  
6 and 6. Cells from the mLN were briefly stimulated ex vivo and the frequency of IL-22<sup>+</sup> cells were  
7 examined in CD4<sup>+</sup>, CD3<sup>+</sup>, CD5<sup>+</sup> T cells, and (C) CD4<sup>+</sup>, CD3<sup>-</sup>, CD5<sup>-</sup> LTi cells. All data are representative of  
8 2 independent experiments with a minimum of 3 mice per time point.

9  
10 **Figure S2. CD4<sup>+</sup> LTi cells are the dominant IL-23-responsive and IL-22-producing innate**  
11 **population in the spleen and IEL, related to Figure 3.** (A) Frequency of CD90<sup>+</sup> CD4<sup>-</sup> cells in the IL-22<sup>+</sup>  
12 gated population of *Rag1*<sup>-/-</sup> splenocytes (SPL) subsequent to culturing with rIL-23 overnight; cells were  
13 also stained with anti- c-kit, NK1.1, NKp46 and CD11c antibodies (bold black lines) and corresponding  
14 isotype and negative control antibodies (solid grey histograms). (B) Frequency of IL-22<sup>+</sup> cells in naïve  
15 *Rag1*<sup>-/-</sup> mice IEL cultures following overnight incubation with rIL-23, and the frequency of CD90<sup>+</sup> CD4<sup>+</sup> and  
16 CD90<sup>+</sup> CD4<sup>-</sup> cells in the IL-22<sup>+</sup> gated population. All in vitro data are representative of 2 or more  
17 independent experiments with a minimum duplicate wells. (C) CD4<sup>+</sup> LTi cells were purified from naïve  
18 *Rag1*<sup>-/-</sup> splenocytes and stained with H&E. Scale bar, 10 μm.

19  
20 **Figure S3. CD4 mAb administration specifically depletes CD4<sup>+</sup> LTi cells, related to Figure 5.**  
21 C57BL/6 *Rag1*<sup>-/-</sup> were administered an isotype control mAb, anti-CD90 mAb or anti-CD4 mAb starting on  
22 day 0, infected with *C. rodentium* on day 0, and sacrificed at day 10. (A) Frequency of CD4<sup>+</sup> CD90<sup>+</sup> cells  
23 in Lin<sup>-</sup> gated splenocytes (SPL) from antibody treated *Rag1*<sup>-/-</sup> mice. (B) Frequency of NK1.1<sup>+</sup> cells in  
24 splenocytes (SPL) from antibody treated *Rag1*<sup>-/-</sup> mice. (C) Frequency of NKp46<sup>+</sup> cells in IEL compartment  
25 from antibody treated *Rag1*<sup>-/-</sup> mice. All data are representative of 2 independent experiments with a  
26 minimum of 2 mice per time point.

27

Figure S1

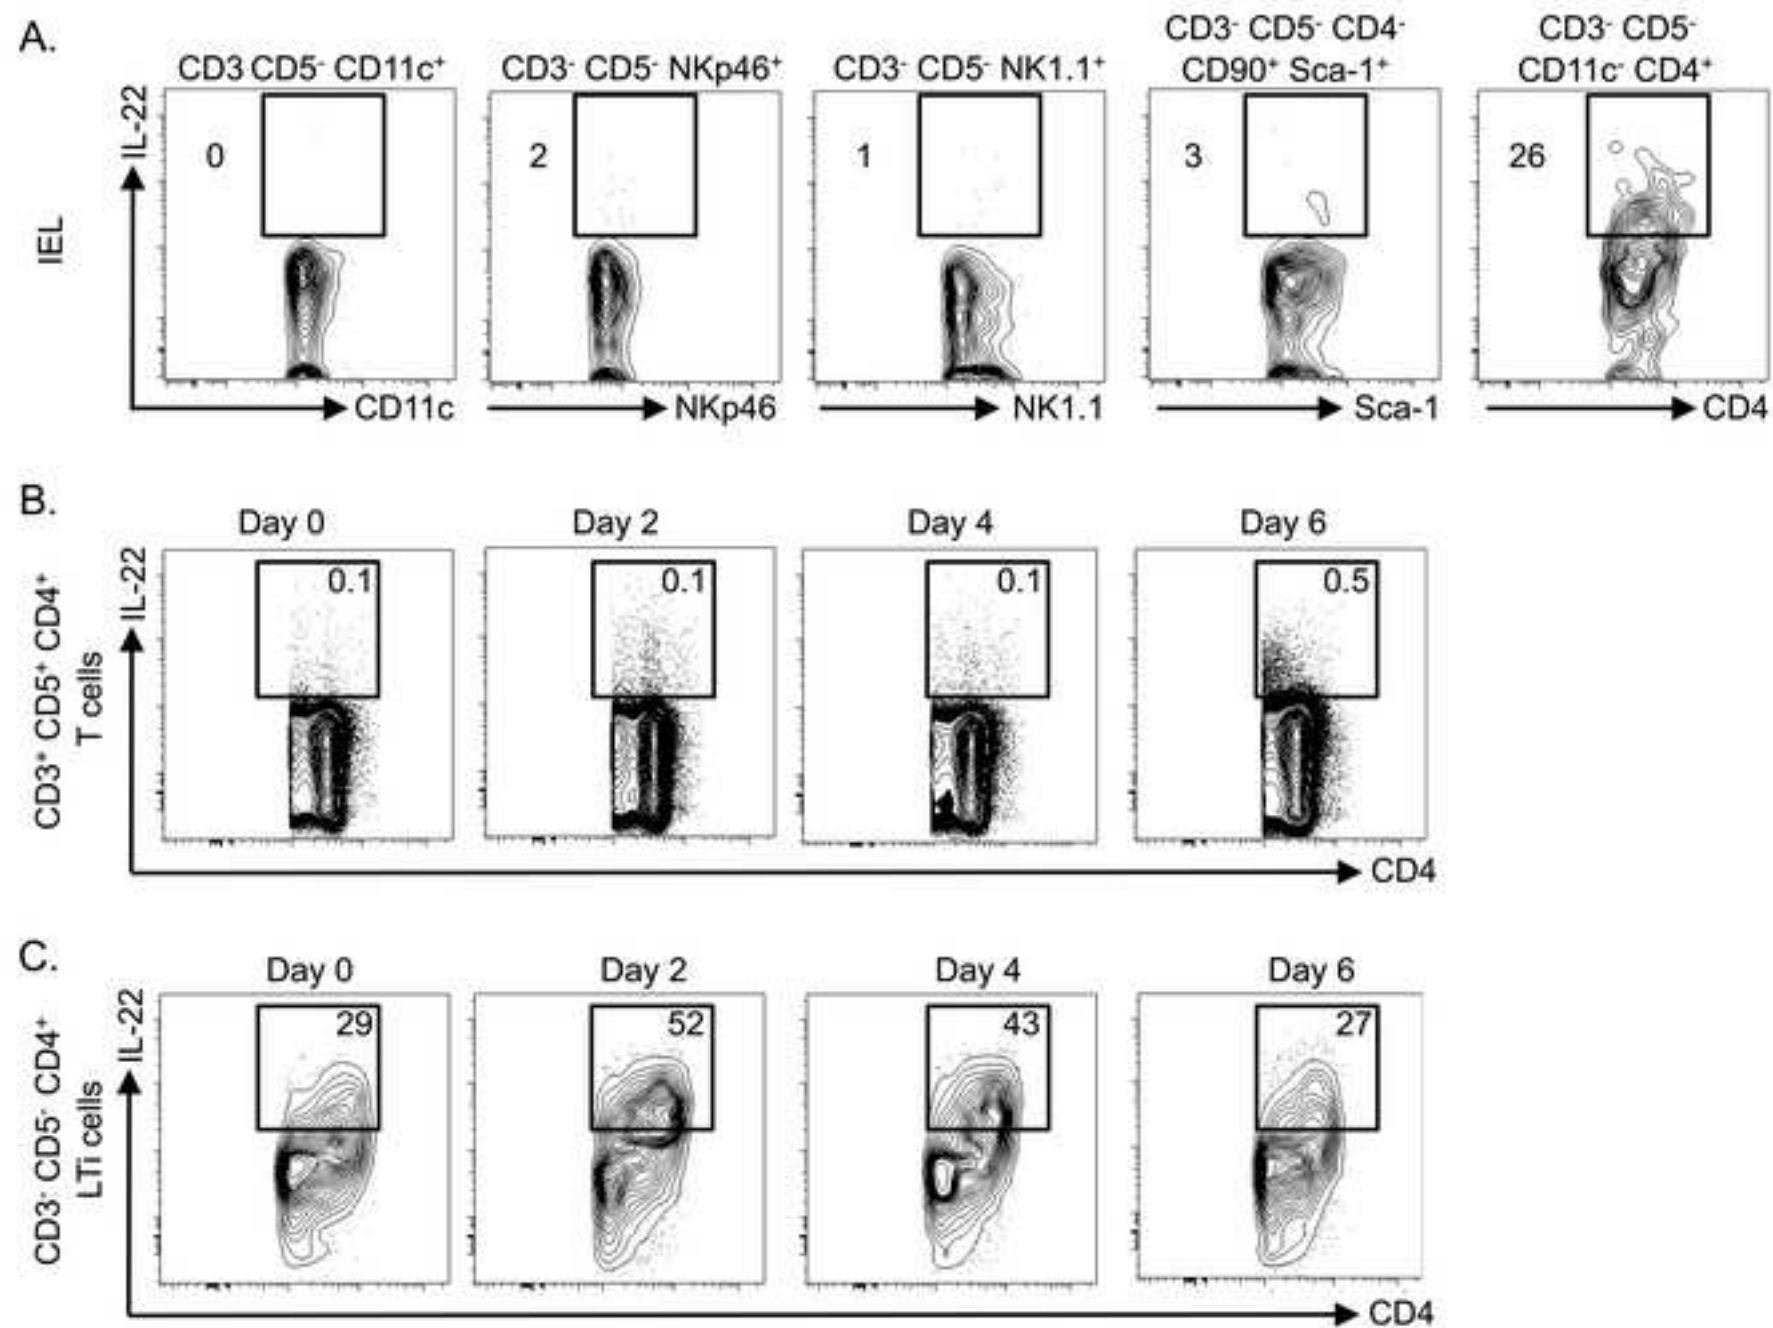

Figure S2

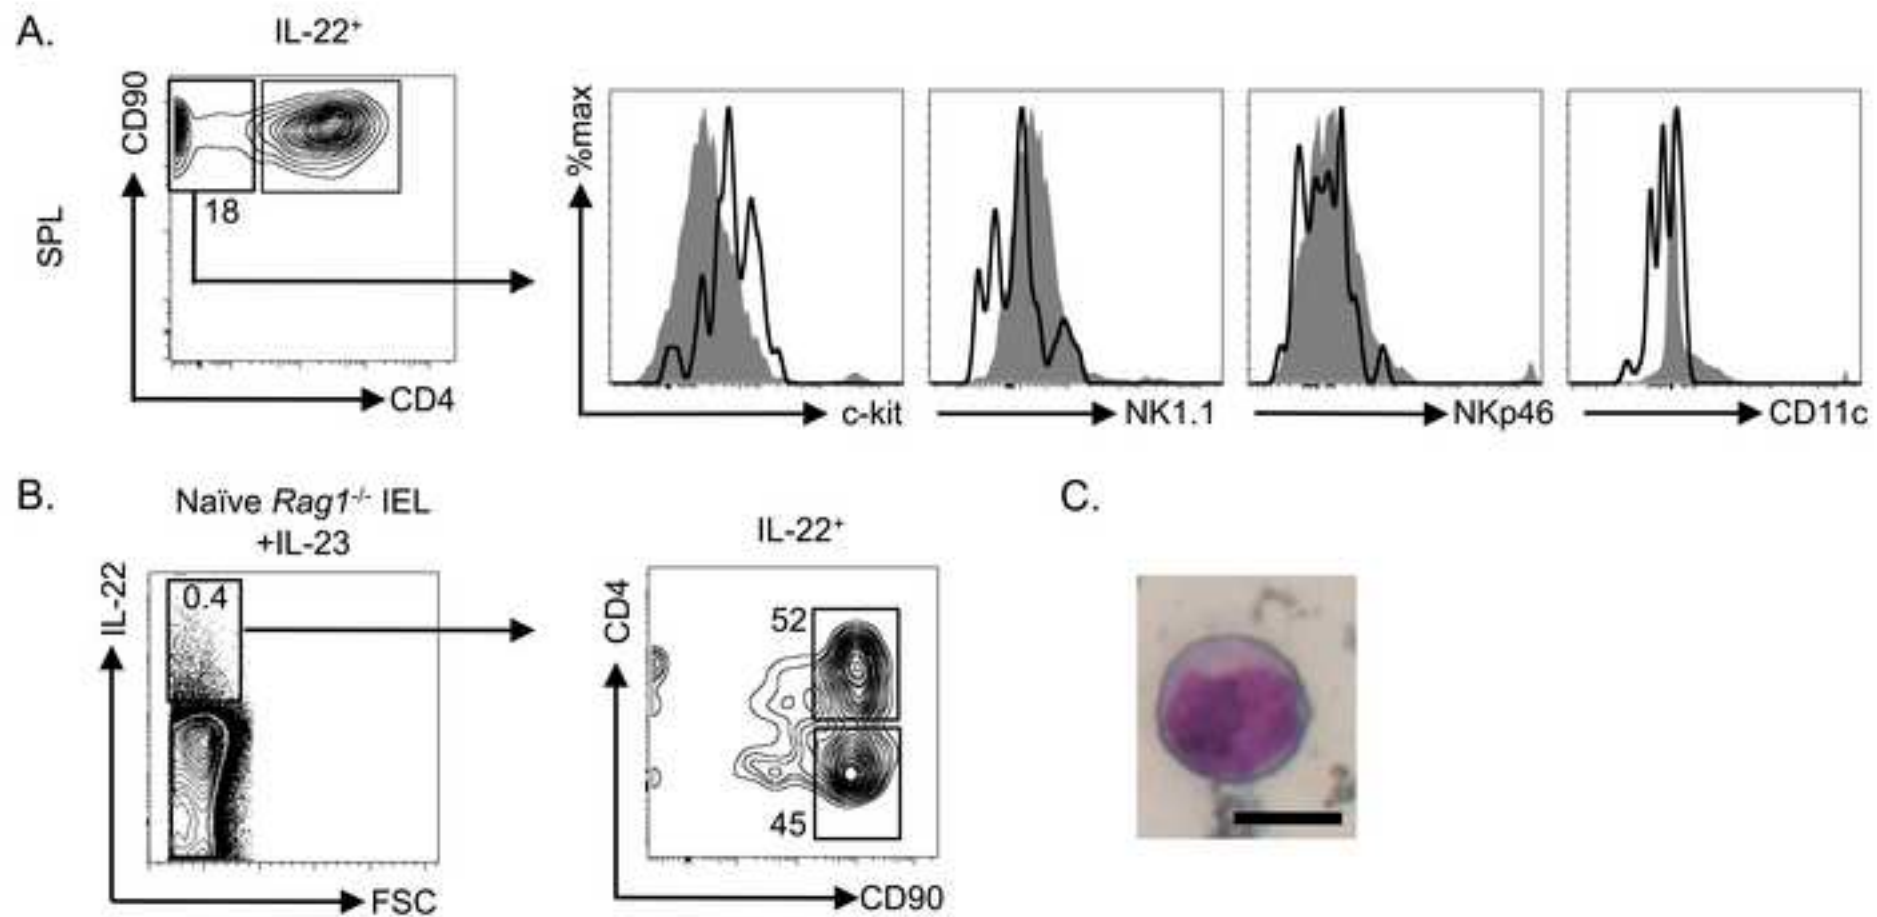

## Figure S3

A.

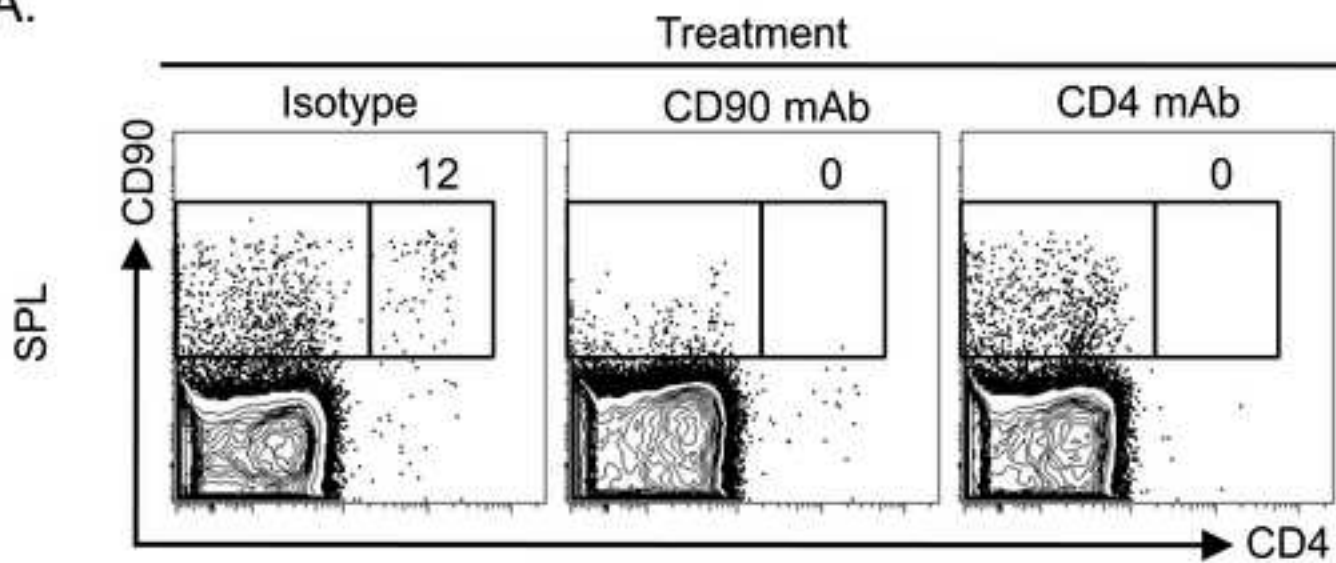

B.

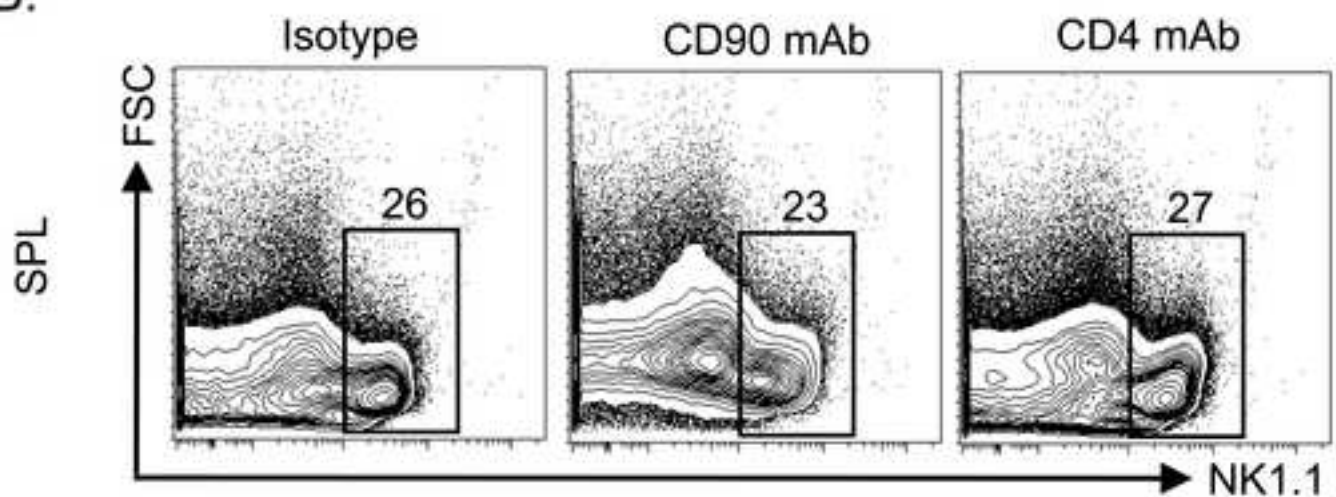

C.

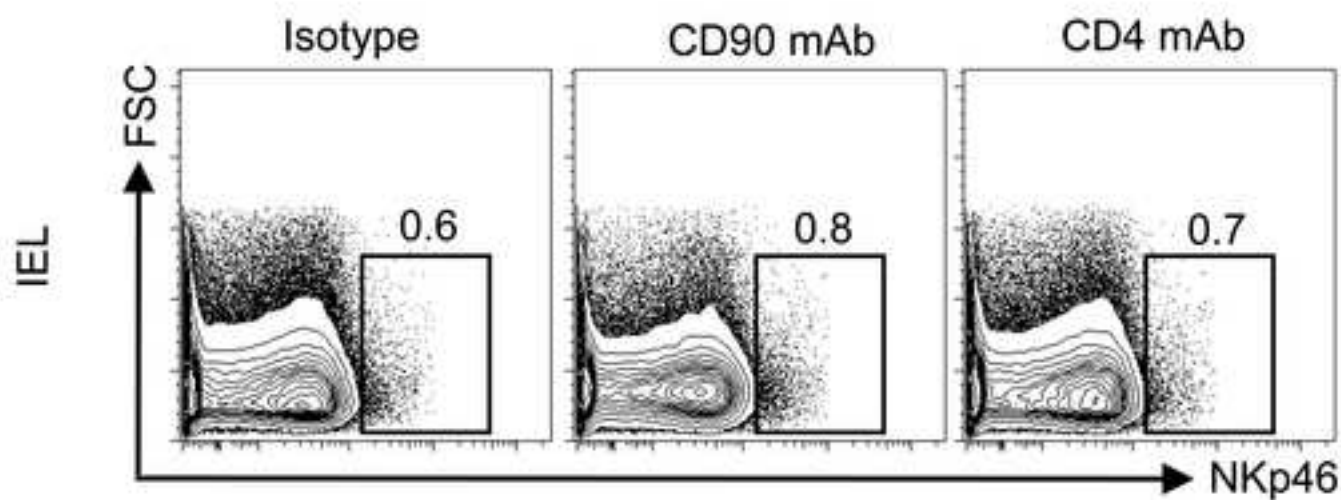

Supplement: NIHMS260239-supplement-01.pdf [file NIHMS260239-supplement-01.pdf]
